# Supplementary material
Source: Springer Nature journal article supplement (https://www.springermedizin.de/resource/supplementary/12903_2011_204_MOESM6_ESM.pdf/9516352)

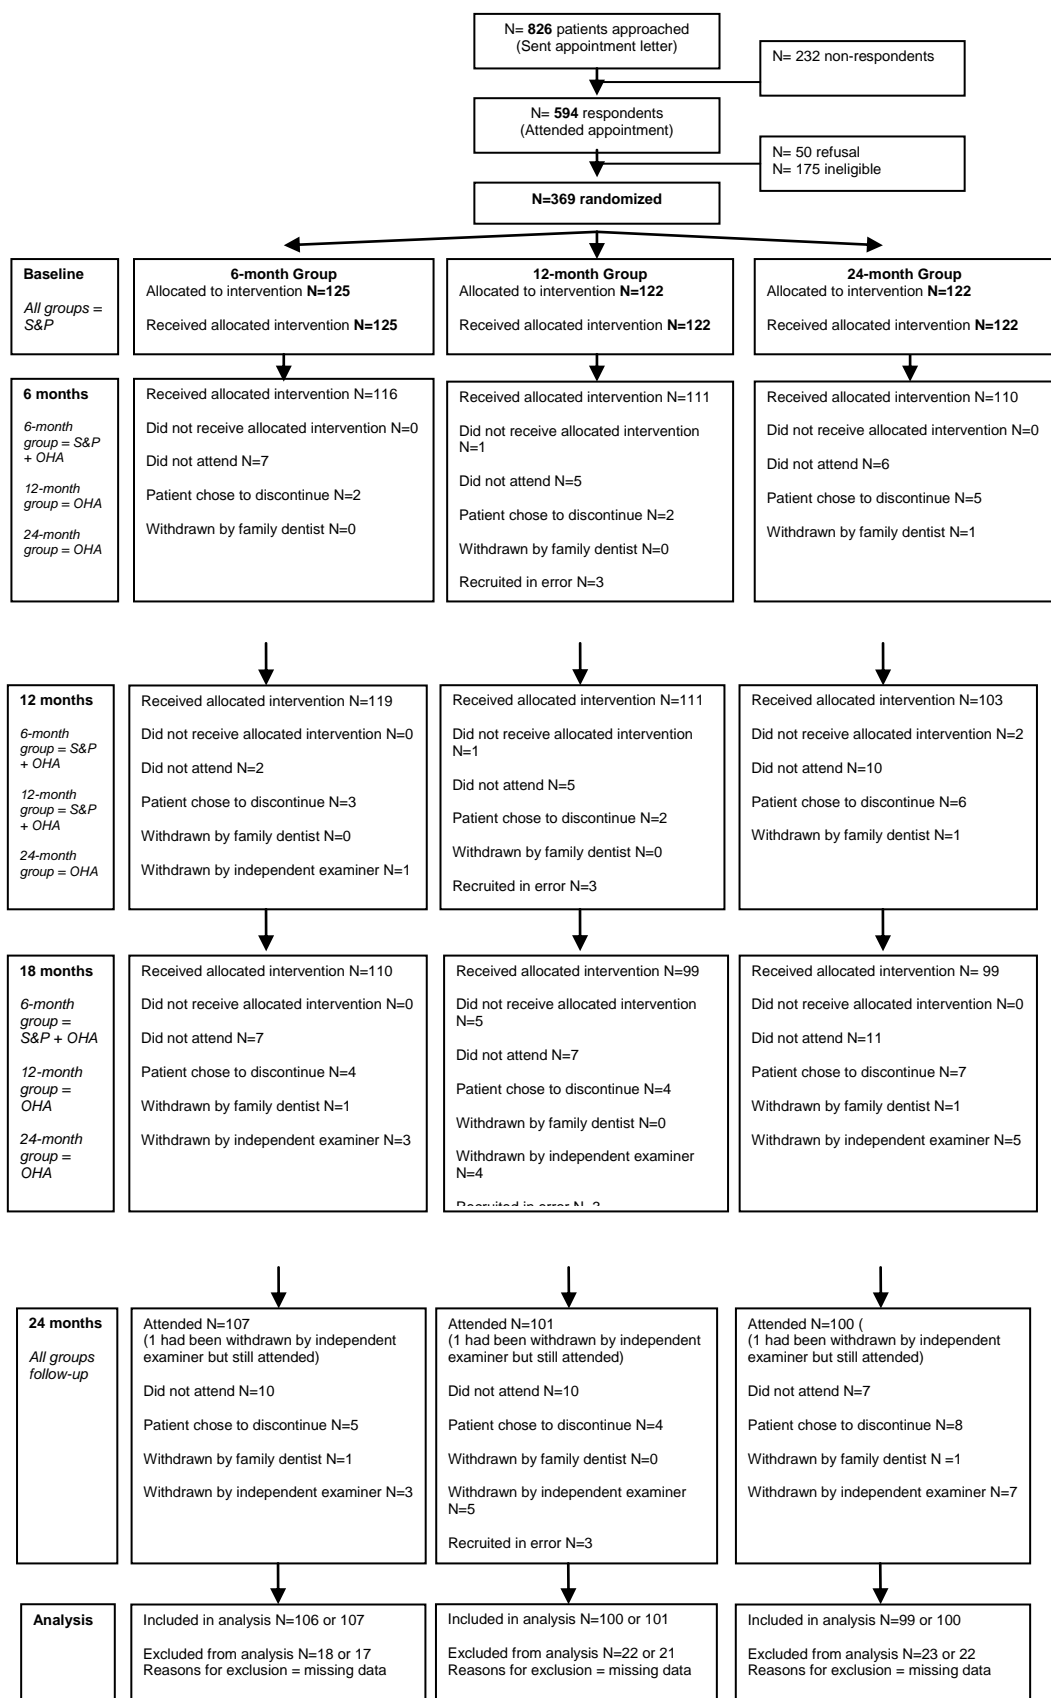

Supplement: MOESM6 [file 9516352]
